# Supplementary material for: The relationship between physical fitness attributes and sports injury in female, team ball sport players: a systematic review
Source: PubMed Central journal article supplement (PMC7490320; doi:10.1186/s40798-020-00264-9), 2020-09-14
Supplement: 40798_2020_264_MOESM2_ESM.pdf [file 40798_2020_264_MOESM2_ESM.pdf]

## **Online Resource 2**

Flow chart of the decision-making process for levels of certainty, based on the level of evidence of studies contributing to the summary conclusion (adapted from: van Sluijs EM, McMinn AM, Griffin SJ. Effectiveness of interventions to promote physical activity in children and adolescents: Systematic review of controlled trials. *Bmj*. 2007; 335(7622): 703. doi:10.1136/bmj.39320.843947.BE).

Title: The relationship between physical fitness attributes and sports injury in female, team ball sport players: A systematic review

Journal: Sports Medicine - Open

Authors: Jessica B. Farley<sup>1</sup>, Lily M. Barrett<sup>2</sup>, Justin W. L. Keogh<sup>1,3,4,5</sup>, Carl T. Woods<sup>6</sup>, Nikki Milne<sup>1</sup>

<sup>1</sup> Faculty of Health Sciences and Medicine, Bond Institute of Health and Sport, Bond University, Gold Coast, Australia

<sup>2</sup> Physical Education and Sport Sciences, University of Limerick, Limerick, Ireland

<sup>3</sup> Sports Performance Research Centre New Zealand, AUT University, Auckland, New Zealand

<sup>4</sup> Cluster for Health Improvement, Faculty of Science, Health, Education and Engineering, University of the Sunshine Coast, Sunshine Coast, Australia

<sup>5</sup> Kasturba Medical College, Mangalore, Manipal Academy of Higher Education, Manipal, Karnataka, India

<sup>6</sup> Institute for Health and Sport, Victoria University, Melbourne, Australia

Corresponding author: Jessica B. Farley, Email: [jfarley@bond.edu.au](mailto:jfarley@bond.edu.au)

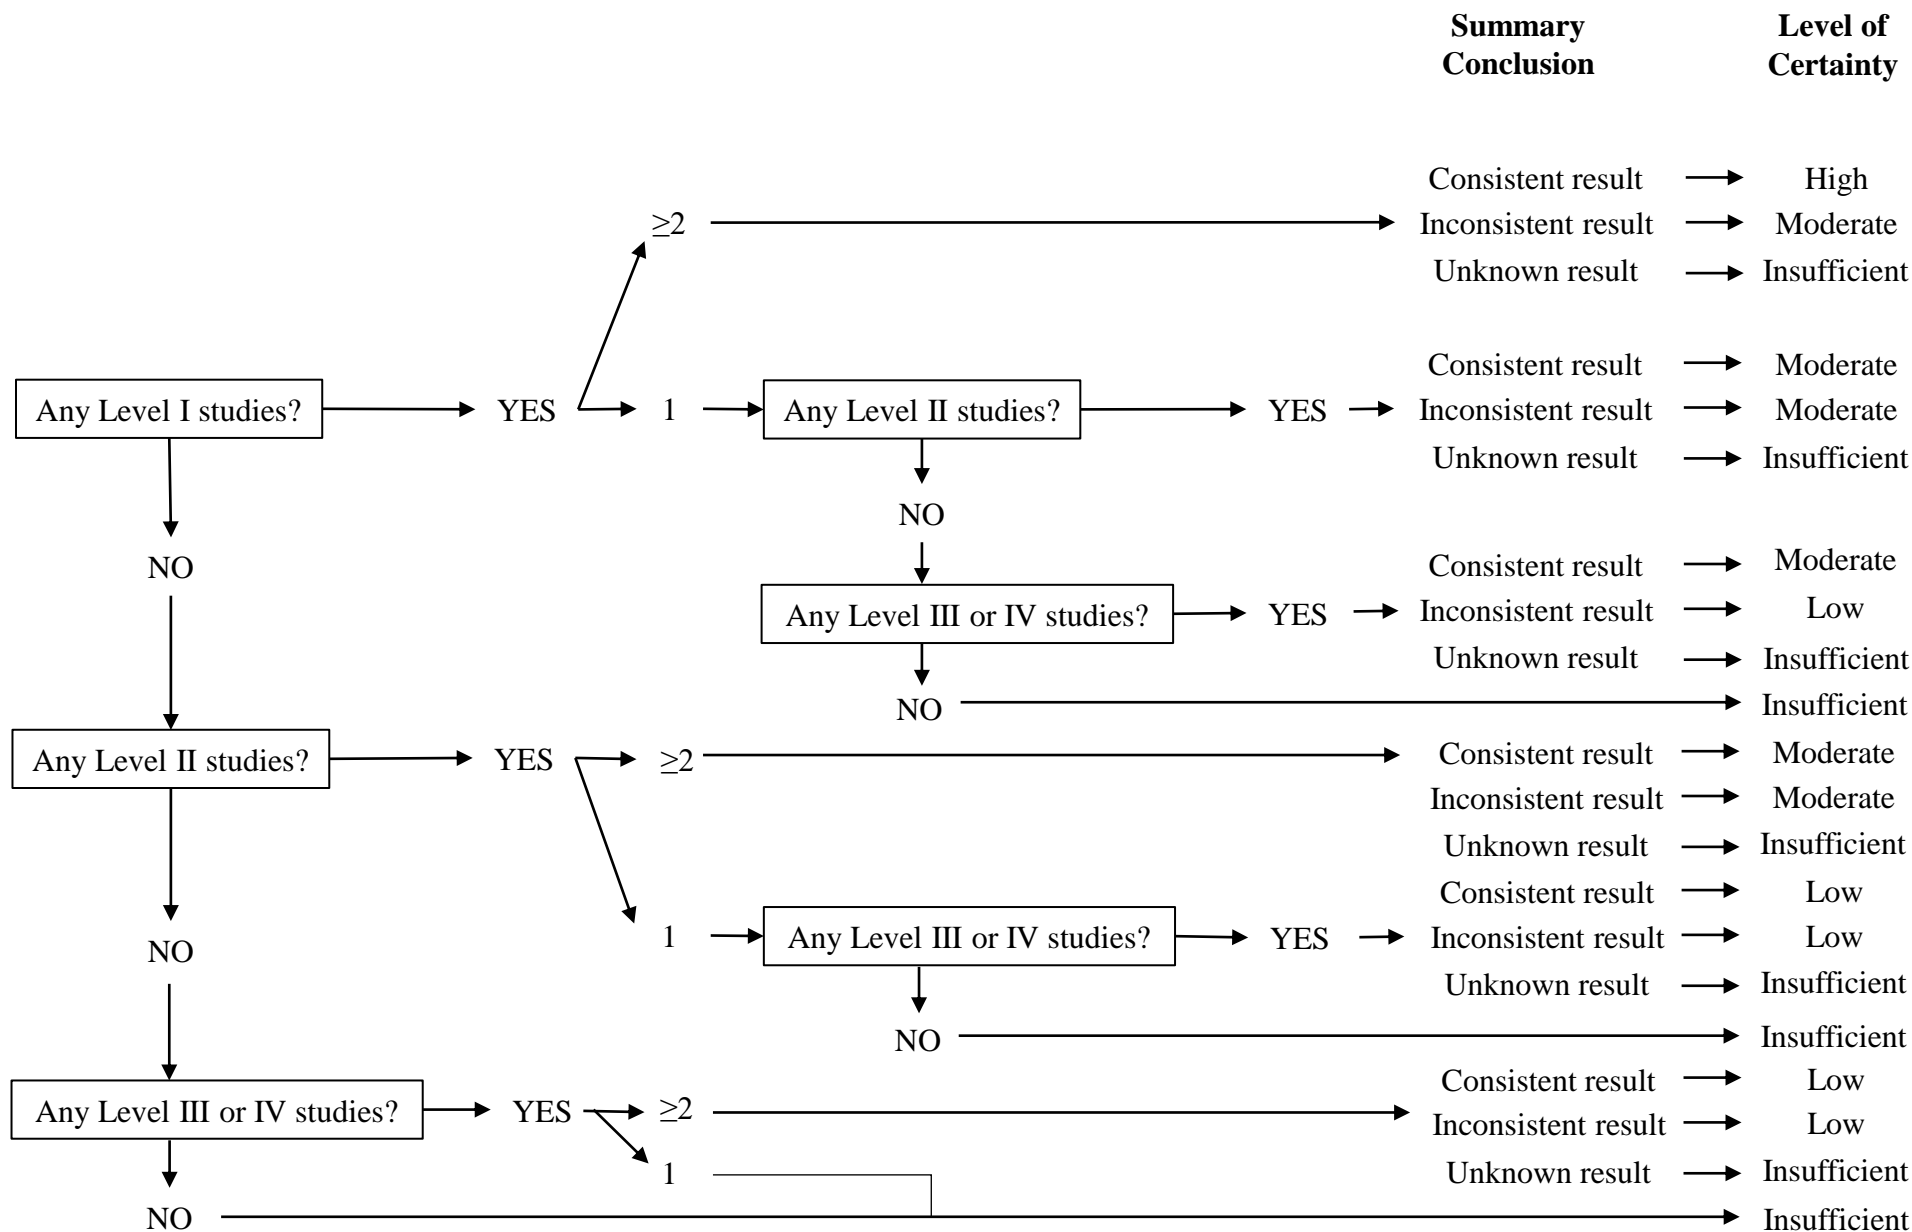

NOTE: Consistent result includes 'clear association' or 'no association' summary conclusions. Inconsistent result includes 'inconsistent association' summary conclusion. Unknown result includes 'unknown' summary conclusion.
